# Supplementary material
Source: PubMed Central journal article supplement (PMC8571757)
Supplement: ONCO-26-956-s001.pdf [file ONCO-26-956-s001.pdf]

Supplemental Tables for:  
Clinical Outcomes and Racial Disparities in Metastatic Hormone Sensitive Prostate Cancer in the Era of Novel Treatment Options

Mehmet Bilen et al.

**Supplement Table 1.** Complete UVA for OS.

| Covariate                                            | Level                          | N   | OS - Months from Drug Initiation |            |               |
|------------------------------------------------------|--------------------------------|-----|----------------------------------|------------|---------------|
|                                                      |                                |     | Hazard Ratio (95% CI)            | HR P-value | Type3 P-value |
| Drug under investigation                             | Docetaxel                      | 94  | 0.80 (0.40-1.59)                 | 0.522      | 0.522         |
|                                                      | Abiraterone                    | 74  | -                                | -          |               |
| Race                                                 | Black                          | 92  | 1.37 (0.73-2.58)                 | 0.324      | 0.324         |
|                                                      | Non-Black                      | 76  | -                                | -          |               |
| Age at diagnosis                                     | >=65                           | 78  | 0.95 (0.51-1.76)                 | 0.865      | 0.865         |
|                                                      | <65                            | 90  | -                                | -          |               |
| Total Gleason score                                  | Unknown                        | 39  | 3.22 (0.72-14.45)                | 0.127      | 0.309         |
|                                                      | 8-10                           | 106 | 2.83 (0.67-11.93)                | 0.156      |               |
|                                                      | 7                              | 23  | -                                | -          |               |
| Grade group                                          | Unknown                        | 39  | 3.22 (0.72-14.45)                | 0.127      | 0.502         |
|                                                      | 5                              | 75  | 2.86 (0.67-12.31)                | 0.157      |               |
|                                                      | 4                              | 31  | 2.76 (0.59-13.02)                | 0.199      |               |
|                                                      | 2-3                            | 23  | -                                | -          |               |
| Baseline diagnosis or recurrence after local disease | Recurrence after local disease | 37  | 1.01 (0.49-2.06)                 | 0.981      | 0.981         |
|                                                      | Baseline Diagnosis             | 131 | -                                | -          |               |
| ECOG at time of starting treatment                   | 2                              | 25  | 2.21 (1.01-4.84)                 | 0.048      | <b>0.039</b>  |
|                                                      | 1                              | 67  | 0.79 (0.39-1.60)                 | 0.507      |               |
|                                                      | 0                              | 76  | -                                | -          |               |

| Covariate                             | Level | N   | OS - Months from Drug Initiation |                |                   |
|---------------------------------------|-------|-----|----------------------------------|----------------|-------------------|
|                                       |       |     | Hazard Ratio<br>(95% CI)         | HR P-<br>value | Type3 P-<br>value |
| Number of distant metastases          | 2-4   | 124 | 1.46 (0.65-3.30)                 | 0.362          | 0.362             |
|                                       | 0-1   | 44  | -                                | -              |                   |
| Bone metastases                       | Yes   | 136 | 1.89 (0.67-5.33)                 | 0.227          | 0.227             |
|                                       | No    | 32  | -                                | -              |                   |
| Liver metastases                      | Yes   | 12  | 3.30 (1.46-7.47)                 | 0.004          | <b>0.004</b>      |
|                                       | No    | 156 | -                                | -              |                   |
| Brain metastases                      | Yes   | 3   | 1.65 (0.23-12.09)                | 0.621          | 0.621             |
|                                       | No    | 165 | -                                | -              |                   |
| Lung metastases                       | Yes   | 29  | 1.00 (0.47-2.11)                 | 0.992          | 0.992             |
|                                       | No    | 139 | -                                | -              |                   |
| Disease volume                        | High  | 111 | 2.12 (0.88-5.06)                 | 0.092          | 0.092             |
|                                       | Low   | 56  | -                                | -              |                   |
| Prior treatment for localized disease | Yes   | 61  | 0.83 (0.43-1.61)                 | 0.589          | 0.589             |
|                                       | No    | 107 | -                                | -              |                   |
| Prior treatment: Prostatectomy        | Yes   | 25  | 0.96 (0.43-2.17)                 | 0.925          | 0.925             |
|                                       | No    | 143 | -                                | -              |                   |
| Prior treatment: Radiation            | Yes   | 55  | 1.06 (0.55-2.06)                 | 0.854          | 0.854             |
|                                       | No    | 112 | -                                | -              |                   |
| Aspirin                               | Yes   | 52  | 0.93 (0.46-1.85)                 | 0.832          | 0.832             |
|                                       | No    | 116 | -                                | -              |                   |

| Covariate    | Level | N   | OS - Months from Drug Initiation |                |                   |
|--------------|-------|-----|----------------------------------|----------------|-------------------|
|              |       |     | Hazard Ratio<br>(95% CI)         | HR P-<br>value | Type3 P-<br>value |
| Metformin    | Yes   | 18  | 0.85 (0.26-2.74)                 | 0.779          | 0.779             |
|              | No    | 150 | -                                | -              |                   |
| Anti HTN     | Yes   | 101 | 0.84 (0.46-1.56)                 | 0.584          | 0.584             |
|              | No    | 67  | -                                | -              |                   |
| Beta blocker | Yes   | 34  | 0.99 (0.46-2.15)                 | 0.982          | 0.982             |
|              | No    | 134 | -                                | -              |                   |
| CCB          | Yes   | 64  | 0.93 (0.49-1.79)                 | 0.839          | 0.839             |
|              | No    | 104 | -                                | -              |                   |
| ACEi/ARB     | Yes   | 53  | 0.82 (0.40-1.67)                 | 0.583          | 0.583             |
|              | No    | 115 | -                                | -              |                   |

**Supplement Table 2.** Complete UVA for PFS.

| Covariate                                            | Level                          | N   | PFS - Months from Drug Initiation |                |                   |
|------------------------------------------------------|--------------------------------|-----|-----------------------------------|----------------|-------------------|
|                                                      |                                |     | Hazard Ratio<br>(95% CI)          | HR P-<br>value | Type3 P-<br>value |
| Drug under investigation                             | Docetaxel                      | 94  | 1.70 (1.06-2.75)                  | 0.029          | <b>0.029</b>      |
|                                                      | Abiraterone                    | 74  | -                                 | -              |                   |
| Race                                                 | Black                          | 92  | 1.33 (0.87-2.05)                  | 0.190          | 0.190             |
|                                                      | Non-Black                      | 76  | -                                 | -              |                   |
| Age at diagnosis                                     | >=65                           | 78  | 0.77 (0.50-1.19)                  | 0.238          | 0.238             |
|                                                      | <65                            | 90  | -                                 | -              |                   |
| Total Gleason score                                  | Unknown                        | 39  | 1.97 (0.84-4.64)                  | 0.119          | 0.285             |
|                                                      | 8-10                           | 106 | 1.78 (0.81-3.92)                  | 0.149          |                   |
|                                                      | 7                              | 23  | -                                 | -              |                   |
| Grade group                                          | Unknown                        | 39  | 1.97 (0.84-4.63)                  | 0.121          | 0.244             |
|                                                      | 5                              | 75  | 2.00 (0.90-4.46)                  | 0.090          |                   |
|                                                      | 4                              | 31  | 1.35 (0.54-3.35)                  | 0.517          |                   |
|                                                      | 2-3                            | 23  | -                                 | -              |                   |
| Baseline diagnosis or recurrence after local disease | Recurrence after local disease | 37  | 0.95 (0.57-1.58)                  | 0.844          | 0.844             |
|                                                      | Baseline Diagnosis             | 131 | -                                 | -              |                   |
| ECOG at time of starting treatment                   | 2                              | 25  | 1.78 (0.96-3.28)                  | 0.067          | 0.170             |
|                                                      | 1                              | 67  | 1.31 (0.82-2.10)                  | 0.257          |                   |
|                                                      | 0                              | 76  | -                                 | -              |                   |
| Number of distant metastases                         | 2-4                            | 124 | 2.07 (1.15-3.75)                  | 0.016          | <b>0.016</b>      |
|                                                      | 0-1                            | 44  | -                                 | -              |                   |

| Covariate                             | Level | N   | PFS - Months from Drug Initiation |                |                   |
|---------------------------------------|-------|-----|-----------------------------------|----------------|-------------------|
|                                       |       |     | Hazard Ratio<br>(95% CI)          | HR P-<br>value | Type3 P-<br>value |
| Bone metastases                       | Yes   | 136 | 1.81 (0.93-3.51)                  | 0.079          | 0.079             |
|                                       | No    | 32  | -                                 | -              |                   |
| Liver metastases                      | Yes   | 12  | 2.47 (1.25-4.85)                  | 0.009          | <b>0.009</b>      |
|                                       | No    | 156 | -                                 | -              |                   |
| Brain metastases                      | Yes   | 3   | 2.06 (0.50-8.46)                  | 0.314          | 0.314             |
|                                       | No    | 165 | -                                 | -              |                   |
| Lung metastases                       | Yes   | 29  | 0.81 (0.46-1.43)                  | 0.463          | 0.463             |
|                                       | No    | 139 | -                                 | -              |                   |
| Disease volume                        | High  | 111 | 2.75 (1.55-4.89)                  | <.001          | <b>&lt;.001</b>   |
|                                       | Low   | 56  | -                                 | -              |                   |
| Prior treatment for localized disease | Yes   | 61  | 0.74 (0.47-1.17)                  | 0.197          | 0.197             |
|                                       | No    | 107 | -                                 | -              |                   |
| Prior treatment: Prostatectomy        | Yes   | 25  | 0.60 (0.32-1.13)                  | 0.114          | 0.114             |
|                                       | No    | 143 | -                                 | -              |                   |
| Prior treatment: Radiation            | Yes   | 55  | 0.90 (0.56-1.44)                  | 0.649          | 0.649             |
|                                       | No    | 112 | -                                 | -              |                   |
| Aspirin                               | Yes   | 52  | 0.74 (0.45-1.19)                  | 0.214          | 0.214             |
|                                       | No    | 116 | -                                 | -              |                   |
| Metformin                             | Yes   | 18  | 1.16 (0.56-2.40)                  | 0.695          | 0.695             |
|                                       | No    | 150 | -                                 | -              |                   |

| Covariate    | Level | N   | PFS - Months from Drug Initiation |                |                   |
|--------------|-------|-----|-----------------------------------|----------------|-------------------|
|              |       |     | Hazard Ratio<br>(95% CI)          | HR P-<br>value | Type3 P-<br>value |
| Anti HTN     | Yes   | 101 | 0.76 (0.50-1.17)                  | 0.219          | 0.219             |
|              | No    | 67  | -                                 | -              |                   |
| Beta blocker | Yes   | 34  | 0.89 (0.52-1.52)                  | 0.675          | 0.675             |
|              | No    | 134 | -                                 | -              |                   |
| CCB          | Yes   | 64  | 0.89 (0.57-1.39)                  | 0.604          | 0.604             |
|              | No    | 104 | -                                 | -              |                   |
| ACEi/ARB     | Yes   | 53  | 0.61 (0.37-1.00)                  | 0.051          | 0.051             |
|              | No    | 115 | -                                 | -              |                   |

**Supplement Table 3.** Complete UVA for PSA CR.

| Covariate                                            | Level                          | N   | Complete Response from Drug Initiation=Yes |            |                 |
|------------------------------------------------------|--------------------------------|-----|--------------------------------------------|------------|-----------------|
|                                                      |                                |     | Odds Ratio (95% CI)                        | OR P-value | Type3 P-value   |
| Drug under investigation                             | Docetaxel                      | 94  | 0.47 (0.25-0.89)                           | 0.020      | <b>0.020</b>    |
|                                                      | Abiraterone                    | 74  | -                                          | -          |                 |
| Race                                                 | Black                          | 92  | 0.22 (0.11-0.42)                           | <.001      | <b>&lt;.001</b> |
|                                                      | Non-Black                      | 76  | -                                          | -          |                 |
| Age at diagnosis                                     | >=65                           | 78  | 1.80 (0.96-3.38)                           | 0.066      | 0.066           |
|                                                      | <65                            | 90  | -                                          | -          |                 |
| Total Gleason score                                  | Unknown                        | 39  | 0.17 (0.05-0.52)                           | 0.002      | <b>0.008</b>    |
|                                                      | 8-10                           | 106 | 0.44 (0.17-1.10)                           | 0.080      |                 |
|                                                      | 7                              | 23  | -                                          | -          |                 |
| Grade group                                          | Unknown                        | 39  | 0.17 (0.05-0.52)                           | 0.002      | <b>0.018</b>    |
|                                                      | 5                              | 75  | 0.41 (0.16-1.06)                           | 0.065      |                 |
|                                                      | 4                              | 31  | 0.53 (0.18-1.58)                           | 0.255      |                 |
|                                                      | 2-3                            | 23  | -                                          | -          |                 |
| Baseline diagnosis or recurrence after local disease | Recurrence after local disease | 37  | 1.69 (0.81-3.54)                           | 0.161      | 0.161           |
|                                                      | Baseline Diagnosis             | 131 | -                                          | -          |                 |
| ECOG at time of starting treatment                   | 2                              | 25  | 0.27 (0.10-0.75)                           | 0.012      | <b>0.001</b>    |
|                                                      | 1                              | 67  | 0.31 (0.16-0.63)                           | 0.001      |                 |
|                                                      | 0                              | 76  | -                                          | -          |                 |
| Number of distant metastases                         | 2-4                            | 124 | 0.32 (0.16-0.65)                           | 0.002      | <b>0.002</b>    |
|                                                      | 0-1                            | 44  | -                                          | -          |                 |

| Covariate                                          | Level | N   | Complete Response from Drug Initiation=Yes |            |                 |
|----------------------------------------------------|-------|-----|--------------------------------------------|------------|-----------------|
|                                                    |       |     | Odds Ratio (95% CI)                        | OR P-value | Type3 P-value   |
| Bone metastases                                    | Yes   | 136 | 0.17 (0.07-0.41)                           | <.001      | <b>&lt;.001</b> |
|                                                    | No    | 32  | -                                          | -          |                 |
| Liver metastases                                   | Yes   | 12  | 0.00 (0.00-1)                              | 0.969      | 0.969           |
|                                                    | No    | 156 | -                                          | -          |                 |
| Brain metastases                                   | Yes   | 3   | 0.00 (0.00-1)                              | 0.985      | 0.985           |
|                                                    | No    | 165 | -                                          | -          |                 |
| Lung metastases                                    | Yes   | 29  | 0.14 (0.04-0.50)                           | 0.002      | <b>0.002</b>    |
|                                                    | No    | 139 | -                                          | -          |                 |
| Disease volume                                     | High  | 111 | 0.10 (0.05-0.20)                           | <.001      | <b>&lt;.001</b> |
|                                                    | Low   | 56  | -                                          | -          |                 |
| Prior treatment for prostate cancer other than ADT | Yes   | 61  | 3.09 (1.60-5.95)                           | <.001      | <b>&lt;.001</b> |
|                                                    | No    | 107 | -                                          | -          |                 |
| Prior treatment: Prostatectomy                     | Yes   | 25  | 2.79 (1.17-6.66)                           | 0.021      | <b>0.021</b>    |
|                                                    | No    | 143 | -                                          | -          |                 |
| Prior treatment: Radiation                         | Yes   | 55  | 1.24 (0.64-2.41)                           | 0.515      | 0.515           |
|                                                    | No    | 112 | -                                          | -          |                 |
| Aspirin                                            | Yes   | 52  | 1.11 (0.57-2.16)                           | 0.763      | 0.763           |
|                                                    | No    | 116 | -                                          | -          |                 |
| Metformin                                          | Yes   | 18  | 1.01 (0.37-2.75)                           | 0.985      | 0.985           |
|                                                    | No    | 150 | -                                          | -          |                 |



| Covariate        | Level | N   | Complete Response from Drug Initiation=Yes |            |               |
|------------------|-------|-----|--------------------------------------------|------------|---------------|
|                  |       |     | Odds Ratio (95% CI)                        | OR P-value | Type3 P-value |
| Anti HTN         | Yes   | 101 | 1.52 (0.80-2.89)                           | 0.206      | 0.206         |
|                  | No    | 67  | -                                          | -          |               |
| Beta blocker     | Yes   | 34  | 1.54 (0.72-3.30)                           | 0.264      | 0.264         |
|                  | No    | 134 | -                                          | -          |               |
| CCB              | Yes   | 64  | 0.74 (0.39-1.42)                           | 0.368      | 0.368         |
|                  | No    | 104 | -                                          | -          |               |
| ACEi/ARB         | Yes   | 53  | 1.67 (0.86-3.25)                           | 0.127      | 0.127         |
|                  | No    | 115 | -                                          | -          |               |
| Age at diagnosis |       | 168 | 1.04 (1.00-1.08)                           | 0.049      | <b>0.049</b>  |

**Supplement Table 4.** Cox Proportional Hazard Models Comparing Clinical Outcomes Based on Race and Upfront Therapy. A) OS, B) PFS, D) PSA CR.

Supplement Table 4a. MVA Cox proportional hazard model for OS - interaction with race

| Race      | Drug                      | N         | OS - Months from Drug Initiation |                |                   |
|-----------|---------------------------|-----------|----------------------------------|----------------|-------------------|
|           |                           |           | Hazard Ratio<br>(95% CI)         | HR P-<br>value | Type3 P-<br>value |
|           |                           |           | -                                | -              | 0.605             |
| Black     | Docetaxel vs. Abiraterone | 47 vs. 44 | 0.86 (0.34-2.15)                 | 0.740          | -                 |
| Non-Black | Docetaxel vs. Abiraterone | 46 vs. 30 | 0.58 (0.17-1.96)                 | 0.380          | -                 |

\* Number of observations in the original data set = 168. Number of observations used = 167.

\*\* The estimated stratified treatment effect was controlled by: Age at diagnosis, Disease volume, ECOG at time of starting treatment, Total Gleason score.

\*\*\* The effect of upfront treatment in the subgroups was estimated by MVA model with interaction term between the treatment group and stratified variables.

Supplement Table 4b. MVA Cox proportional hazard model for PFS - interaction with race

| Race      | Drug                      | N         | PFS - Months from Drug Initiation |                |                   |
|-----------|---------------------------|-----------|-----------------------------------|----------------|-------------------|
|           |                           |           | Hazard Ratio<br>(95% CI)          | HR P-<br>value | Type3 P-<br>value |
|           |                           |           | -                                 | -              | 0.130             |
| Black     | Docetaxel vs. Abiraterone | 47 vs. 44 | 2.27 (1.16-4.42)                  | <b>0.016</b>   | -                 |
| Non-Black | Docetaxel vs. Abiraterone | 46 vs. 30 | 1.02 (0.46-2.26)                  | 0.962          | -                 |

\* Number of observations in the original data set = 168. Number of observations used = 167.

\*\* The estimated stratified treatment effect was controlled by: Age at diagnosis, Disease volume, ECOG at time of starting treatment, Total Gleason score

\*\*\* The effect of upfront treatment in the subgroups was estimated by MVA model with interaction term between the treatment group and stratified variables.

Supplement Table 4c. MVA Logistic Regression for PSA Complete Response - interaction with race

| Race      | Drug                      | N         | Complete Response from Drug<br>Initiation=Yes |                |                   |
|-----------|---------------------------|-----------|-----------------------------------------------|----------------|-------------------|
|           |                           |           | Odds Ratio<br>(95% CI)                        | OR P-<br>value | Type3 P-<br>value |
| Black     | Docetaxel vs. Abiraterone | 47 vs. 44 | 0.20 (0.05-0.79)                              | <b>0.021</b>   | -                 |
| Non-Black | Docetaxel vs. Abiraterone | 46 vs. 30 | 0.75 (0.24-2.37)                              | 0.622          | -                 |

\* Number of observations in the original data set = 168. Number of observations used = 167.

\*\* The estimated stratified treatment effect was controlled by: Age at diagnosis, Disease volume, ECOG at time of starting treatment, Total Gleason score.

\*\*\* The effect of upfront treatment in the subgroups was estimated by MVA model with interaction term between the treatment group and stratified variables.
